# Supplementary material
Source: HighWire-hosted journal article supplement (https://dmd.aspetjournals.org/content/suppl/2019/12/23/dmd.119.089615)
Supplement: 89615_Data_Supplement.pdf [file 89615_Data_Supplement.pdf]

## Supplemental Materials

### **Induction of Human Intestinal and Hepatic Organic Anion Transporting Polypeptides; Where is the Evidence for its Relevance in Drug-Drug Interactions?**

A. David Rodrigues, Yurong Lai, Hong Shen, Manthena V.S. Varma, Andrew Rowland,  
and Stefan Oswald

ADME Sciences, Medicine Design, Worldwide Research & Development, Pfizer Inc.,  
Groton CT USA (A.D.R., M.V.S.V.), College of Medicine and Public Health, Flinders  
University, Adelaide, SA, Australia (A.R.), Drug Metabolism Department, Gilead Sciences,  
Inc., Foster City, California, USA (Y.L.), Department of Metabolism and Pharmacokinetics,  
Bristol-Myers Squibb Research and Development, Princeton, New Jersey, USA (H.S.), and  
Department of Clinical Pharmacology, Center of Drug Absorption and Transport, University  
Medicine of Greifswald, Felix-Hausdorff-Straße. 3, 17487 Greifswald, Germany (S.O.)

- Table S1. Drug interaction between itraconazole with pravastatin compared to coproporphyrin isomers and digoxin.
- Table S2. Clinical assessment of rifampicin as inhibitor of CYP3A and Pgp; digoxin and dabigatran etexilate as Pgp probes; and midazolam as CYP3A probe.
- Table S3. Rifampicin and its metabolites as solute carrier, Pgp and MRP2 substrates in vitro (Pfizer, unpublished data).
- Table S4. Impact of various known CYP3A inducers on the PK of Pgp probe drugs digoxin and dabigatran

**Table S1**

Drug interaction between itraconazole with pravastatin compared to coproporphyrin isomers and digoxin

| PO Itraconazole dose |          | Probe               |                                                          | % Increase in probe AUC | Reference             |
|----------------------|----------|---------------------|----------------------------------------------------------|-------------------------|-----------------------|
| Dose (mg)            | Duration | Dose (mg)           | Timing of dose after itraconazole last dose <sup>a</sup> |                         |                       |
| 200                  | 5 days   | PO Pravastatin (40) | 4 hr                                                     | 49                      | Mazzu et al., 2000    |
| 200                  | 4 days   | PO Pravastatin (40) | 2 hr                                                     | 72                      | Neuvonen et al., 1998 |
| 200                  | 30 days  | PO Pravastatin (40) | Co-dose                                                  | 12                      | Jacobson, 1997        |
| 200                  | 8 days   | Coproporphyrin I    | N/A                                                      | 6                       | Shen et al., 2018     |
|                      |          | Coproporphyrin III  | N/A                                                      | 9                       |                       |
| 200                  | 5 days   | PO Digoxin (0.5)    | 1 hr                                                     | 68                      | Jalava et al., 1997   |

N/A: not applicable

<sup>a</sup>Plasma T<sub>max</sub> of itraconazole = 3-4 hr (Harden et al., 1988).

Hardin TC, Graybill JR, Fetchick R, Woestenborghs R, Rinaldi MG, and Kuhn JG (1988) Pharmacokinetics of itraconazole following oral administration to normal volunteers. *Antimicrob Agents Chemother* **32**:1310-1313.

Jacobson TA (1997) Comparative pharmacokinetic interaction profiles of pravastatin, simvastatin, and atorvastatin when co-administered with cytochrome P450 inhibitors. *Am J Cardiol* **94**:1140-1146.

Jalava KM, Partanen J, and Neuvonen PJ (1997) Itraconazole decreases renal clearance of digoxin. *Ther Drug Monit* **19**:609-613.

Mazzu AL, Lasseter KC, Shamblen EC, Agarwal V, Lettieri J, and Sundaresen P (2000) Itraconazole alters the pharmacokinetics of atorvastatin to a greater extent than either cerivastatin or pravastatin. *Clin Pharmacol Ther* **68**:391-400.

Neuvonen PJ, Kantola T, and Kivistö KT (1998) Simvastatin but not pravastatin is very susceptible to interaction with the CYP3A4 inhibitor itraconazole. *Clin Pharmacol Ther* **63**:332-341.

Shen H, Christopher L, Lai Y, Gong J, Kandoussi H, Garonzik S, Perera V, Garimella T, and Humphreys WG (2018) Further studies to support the use of coproporphyrin I and III as novel clinical biomarkers for evaluating the potential for organic anion transporting polypeptide 1B1 and OATP1B3 inhibition. *Drug Metab Dispos* **46**:1075-1082.

**Table S2**

Clinical assessment of rifampicin as inhibitor of CYP3A and Pgp; digoxin and dabigatran etexilate as Pgp probes; and midazolam as CYP3A probe

| Oral rifampicin dose (mg) | Oral probe drug (dose)       | Probe dose timing vs rifampicin dose | % Increase in probe plasma AUC | Reference                    |
|---------------------------|------------------------------|--------------------------------------|--------------------------------|------------------------------|
| 600                       | Digoxin (0.5 mg)             | Co-dose                              | 29.9                           | Kirby et al., 2012           |
| 600                       | Digoxin (0.5 mg)             | 1 hr after rifampicin                | 46.2                           | Reitman et al., 2011         |
| 600                       | DABE (0.375 µg) <sup>a</sup> | Co-dose                              | 132 <sup>a</sup>               | Prueksaritanont et al., 2017 |
| 600                       | Midazolam (33 µg)            | Co-dose                              | 14.7                           | Maeda et al., 2011           |
| 600                       | Midazolam (0.07 mg)          | Co-dose                              | 21.3                           | Yoshikado et al., 2017       |
| 600                       | Midazolam (10 µg)            | Co-dose                              | 5.6                            | Prueksaritanont et al., 2017 |

<sup>a</sup>Dosed as dabigatran etexilate (DABE) prodrug but DDI reported out as AUC of parent drug dabigatran.

Kirby BJ, Collier AC, Kharasch ED, Whittington D, Thummel KE, and Unadkat JD (2012) Complex drug interactions of the HIV protease inhibitors 3: effect of simultaneous or staggered dosing of digoxin and ritonavir, nelfinavir, rifampin, or bupropion. *Drug Metab Dispos* **40**:610-616.

Maeda K, Ikeda Y, Fujita T, Yoshida K, Azuma Y, Haruyama Y, Yamane N, Kumagai Y, and Sugiyama Y (2011) Identification of the rate-determining process in the hepatic clearance of atorvastatin in a clinical cassette microdosing study. *Clin Pharmacol Ther* **90**:575-581.

Prueksaritanont T, Tatosian DA, Chu X, Railkar R, Evers R, Chavez-Eng C, Lutz R, Zeng W, Yabut J, Chan GH, Cai X, Latham AH, Hehman J, Stypinski D, Brejda J, Zhou C, Thornton B, Bateman KP, Fraser I, and Stoch SA (2017) Validation of a microdose probe drug cocktail for clinical drug interaction assessments for drug transporters and CYP3A. *Clin Pharmacol Ther* **101**:519-530.

Reitman ML, Chu X, Cai X, Yabut J, Venkatasubramanian R, Zajic S, Stone JA, Ding Y, Witter R, Gibson C, Roupe K, Evers R, Wagner JA, and Stoch A (2011) Rifampin's acute inhibitory and chronic inductive drug interactions: experimental and model-based approaches to drug-drug interaction trial design. *Clin Pharmacol Ther* **89**:234-242.

Yoshikado T, Maeda K, Furihata S, Terashima H, Nakayama T, Ishigame K, Tsunemoto K, Kusuhara H, Furihata KI, and Sugiyama Y (2017) A clinical cassette dosing study for evaluating the contribution of hepatic OATPs and CYP3A to drug-drug interactions. *Pharm Res* **34**:1570-1583.

**Table S3**

Rifampicin and its metabolites as solute carrier, Pgp and MRP2 substrates in vitro (Pfizer, unpublished data)

| Substrate (Conc.)                  | Uptake ratio in HEK293 cells (vs mock HEK293 cells) <sup>a</sup> |                  |                    |                   |
|------------------------------------|------------------------------------------------------------------|------------------|--------------------|-------------------|
|                                    | NTCP                                                             | OATP2B1          | OATP1B3            | OATP1B1           |
| Rifampicin (RIF) (0.2 μM)          | 1.1 ± 0.2                                                        | 0.6 ± 0.1        | <b>2.5 ± 0.1</b>   | <b>3.1 ± 0.1</b>  |
| 3-Formyl RIF (0.2 μM)              | 1.1 ± 0.2                                                        | 0.5 ± 0.1        | <b>5.5 ± 0.9</b>   | <b>4.6 ± 1.0</b>  |
| 25-Desacetyl RIF (0.2 μM)          | 1.0 ± 0.1                                                        | 0.6 ± 0.2        | <b>19 ± 1.7</b>    | <b>23 ± 1.0</b>   |
| 3-Formyl/25-Desacetyl RIF (0.2 μM) | 1.1 ± 0.1                                                        | 0.5 ± 0.2        | <b>32 ± 0.6</b>    | <b>37 ± 3.4</b>   |
| Taurocholic acid (0.2 μM)          | <b>70.1 ± 10.6</b>                                               | - <sup>b</sup>   | -                  | -                 |
| Rosuvastatin (1 μM)                | -                                                                | <b>8.2 ± 0.7</b> | <b>72.2 ± 18.2</b> | <b>97.9 ± 4.0</b> |

<sup>a</sup>Mean ± SD of n = 3 determinations. <sup>b</sup>Not determined. **Uptake ratio > 2 indicates compound is a substrate.**

OATP, organic anion transporting polypeptide; NTCP, sodium-dependent taurocholate co-transporting polypeptide.

| Substrate (2 μM)          | MDCK cell line (transwell B-A/A-B flux ratio) <sup>a</sup> |                            |
|---------------------------|------------------------------------------------------------|----------------------------|
|                           | MDCK cells expressing Pgp                                  | MDCK cells expressing MRP2 |
| Rifampicin (RIF)          | <b>29.4, 21.3</b>                                          | <b>36.1, 17.9</b>          |
| 3-Formyl RIF              | <b>175, 51.4</b>                                           | <b>64.2, 18.0</b>          |
| 25-Desacetyl RIF          | <b>56.3, 54.7</b>                                          | <b>5.5, 2.4</b>            |
| 3-Formyl/25-Desacetyl RIF | <b>101<sup>b</sup></b>                                     | <b>3.5<sup>b</sup></b>     |

<sup>a</sup>Values for two different experiments shown. B-A, basolateral-to-apical flux; A-B, apical-to-basolateral flux. **For MRP2 cell line, B-A/A-B ratio > 2 indicates compound is a substrate** (all ratios reduced to ~1.0 with MRP2 inhibitor MK571, 0.1 mM). **For Pgp cell line, compound is designated as substrate if B-A/A-B ratio > 6**; quinidine (2 μM) as positive control (B-A/A-B ratio = 125) and sertraline as negative control (B-A/A-B ratio = 3.2).<sup>b</sup>Only one experiment was attempted.

Pgp, P-glycoprotein; MRP2, multidrug resistance-associated protein 2.

**Table S4**

Impact of various known CYP3A inducers on the PK of Pgp probe drugs digoxin and dabigatran

| Object     | Object | Precipitant     | Precipitant | % Change AUC | Object Dose                                                 | Precipitant Dose           |
|------------|--------|-----------------|-------------|--------------|-------------------------------------------------------------|----------------------------|
| digoxin    | Oral   | phenytoin       | Oral        | -22.8        | 0.4 mg                                                      | 0.2 g (7 days)             |
| digoxin    | Oral   | phenytoin       | Oral        | -22.8        | 1 mg iv on day 1 and 0.4 mg po for 7 days (8 days)          | 0.2 g (8 days)             |
| digoxin    | Oral   | rifampin        | Oral        | -30.4        | 0.25 mg                                                     | 300 mg (7 days)            |
| digoxin    | Oral   | rifampin        | Oral        | -30.3        | 1 mg                                                        | 600 mg/day (10 days)       |
| digoxin    | Oral   | rifampin        | Oral        | -21.1        | 0.5 mg                                                      | 600 mg (14 days)           |
| digoxin    | Oral   | rifampin        | Oral        | -18.2        | 0.5 mg                                                      | 600 mg/day (6 days)        |
| digoxin    | Oral   | rifampin        | Oral        | -16          | 0.5 mg                                                      | 300 mg (7 days)            |
| digoxin    | Oral   | rifampin        | Oral        | -15.6        | 0.4 mg                                                      | 300 mg (7 days)            |
| digoxin    | Oral   | st. John's wort | Oral        | -28          | 0.2-0.3 loading dose followed by maintenance dose (21 days) | 4 g encapsulated           |
| digoxin    | Oral   | st. John's wort | Oral        | -28          | 0.25 mg                                                     | 300 mg (14 days)           |
| digoxin    | Oral   | st. John's wort | Oral        | -26.7        | 0.2-0.3 loading dose followed by maintenance dose (21 days) | hyperforin-rich extract    |
| digoxin    | Oral   | st. John's wort | Oral        | -25          | 0.25 mg (15 days)                                           | 300 mg (extract) (10 days) |
| dabigatran | Oral   | carbamazepine   | Oral        | -31.8        | 75 mg (as dabigatran etexilate)                             | 300 mg (26 days)           |
| dabigatran | Oral   | rifabutin       | Oral        | -24.9        | 75 mg (as dabigatran etexilate)                             | 300 mg (26 days)           |
| dabigatran | Oral   | rifampin        | Oral        | -71.6        | 75 mg (as dabigatran etexilate)                             | 600 mg (17 days)           |
| dabigatran | Oral   | rifampin        | Oral        | -67          | 150 mg                                                      | 600 mg (8 days)            |
| dabigatran | Oral   | rifampin        | Oral        | -61.5        | 75 mg (as dabigatran etexilate)                             | 75 mg (17 days)            |
| dabigatran | Oral   | rifampin        | Oral        | -35.6        | 75 mg (as dabigatran etexilate)                             | 10 mg (17 days)            |

Data obtained on line at <https://didb.druginteractionsolutions.org/>
